# Supplementary material for: Noonan syndrome: improving recognition and diagnosis
Source: PubMed Central journal article supplement — Arch Dis Child. 2022 Mar 4;107(12):1073–8. doi: 10.1136/archdischild-2021-322858 (PMC9685729; doi:10.1136/archdischild-2021-322858), 2022-03-04
Supplement: archdischild-2021-322858supp001.pdf [file archdischild-2021-322858supp001.pdf]

## Supplemental Information: infographic for distribution

### Recognising Noonan syndrome

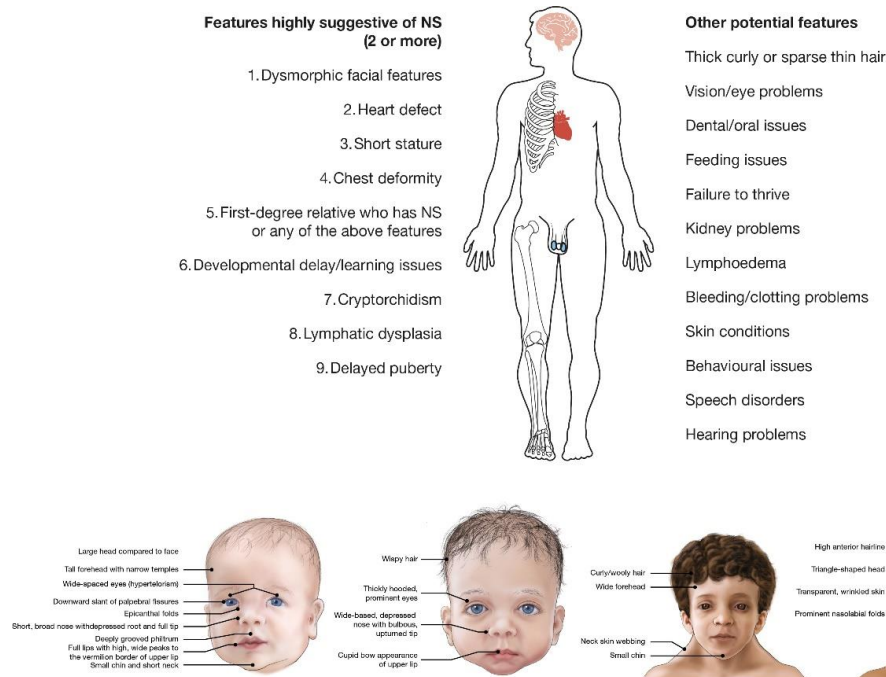

Facial images are public domain images from the National Human Genome Research Institute, National Institutes of Health, Bethesda, MD, USA. NS, Noonan syndrome.
